# Supplementary material for: Use antibiotics in cell culture with caution: genome-wide identification of antibiotic-induced changes in gene expression and regulation
Source: PubMed Central journal article supplement (PMC5548911; doi:10.1038/s41598-017-07757-w), 2017-08-08
Supplement: 41598_2017_7757_MOESM1_ESM.pdf [file 41598_2017_7757_MOESM1_ESM.pdf]

# **Use antibiotics in cell culture with caution: genome-wide identification of antibiotic-induced changes in gene expression and regulation**

Ann H. Ryu<sup>1,2</sup>, Walter L. Eckalbar<sup>1,2</sup>, Anat Kreimer<sup>1,3</sup>, Nir Yosef<sup>3,4</sup>, Nadav Ahituv<sup>1,2\*</sup>

<sup>1</sup>Department of Bioengineering and Therapeutic Sciences, University of California San Francisco, San Francisco, CA, USA

<sup>2</sup>Institute for Human Genetics, University of California San Francisco, San Francisco, CA, USA

<sup>3</sup>Department of Electrical Engineering and Computer Science and the Center for Computational Biology, University of California Berkeley, Berkeley, CA, USA

<sup>4</sup>Ragon Institute of Massachusetts General Hospital, Massachusetts Institute of Technology, and Harvard University, 02139 Boston, Massachusetts, USA

\*Correspondence: [nadav.ahituv@ucsf.edu](mailto:nadav.ahituv@ucsf.edu)



**Supplementary Figure S1. qPCR validation for eight PenStrep RNA-seq differential expressed genes.**  $\Delta\Delta C_t$  values for *CYP4F3*, *CYP7A1*, *TNNI2*, *PCP4L1*, *KRTAP3-1*, *BEX2*, *HIST1H2AK*, *BTBD19* were normalized to housekeeping gene expression levels, then calculated between PenStrep and control conditions. These  $\Delta\Delta C_t$  values were plotted in parallel with the log2fold change FPKM values from the RNA-seq results for each gene.
